# Supplementary material for: Pressurized CO2 as a carboxylating agent for the biocatalytic ortho-carboxylation of resorcinol
Source: Green Chem. 2018 Apr 3;20(8):1754–9. doi: 10.1039/c8gc00008e (PMC5942041; doi:10.1039/c8gc00008e)
Supplement: Supplementary file 1 [file GC-020-C8GC00008E-s001.pdf]

## Pressurized CO<sub>2</sub> as Carboxylating Agent for the Biocatalytic *ortho*-Carboxylation of Resorcinol

Katharina Plasch,<sup>b</sup> Gerhard Hofer,<sup>c</sup> Walter Keller,<sup>c</sup> Sam Hay,<sup>d</sup> Derren Heyes,<sup>d</sup> Alexander Dennig,<sup>e</sup>  
Silvia M. Glueck,<sup>a,b,\*</sup> Kurt Faber,<sup>b,\*</sup>

[a] Austrian Centre of Industrial Biotechnology (ACIB), c/o

[b] Department of Chemistry, Organic & Bioorganic Chemistry, University of Graz, Heinrichstrasse 28, 8010 Graz, Austria

[c] Institute of Molecular Biosciences, University of Graz, Humboldtstrasse 50, 8010 Graz, Austria

[d] Manchester Institute of Biotechnology, University of Manchester, 131 Princess Street, Manchester M1 7DN, United Kingdom

[e] Institute of Biotechnology and Biochemical Engineering, Technical University of Graz, Petersgasse 12, 8010 Graz, Austria

### Electronic Supporting Information

|      |                                                                                     |   |
|------|-------------------------------------------------------------------------------------|---|
| 1.   | Purification of 2,6-DHBD_ <i>Rs</i> and 2,3-DHBD_ <i>Ao</i>                         | 2 |
| 2.   | Sparkling water study                                                               | 2 |
| 2.1. | Sparkling water analysis                                                            | 2 |
| 2.2. | Sparkling water screening                                                           | 2 |
| 3.   | Time study                                                                          | 3 |
| 4.   | Evaluation of buffer system                                                         | 4 |
| 5.   | High-resolution MS                                                                  | 4 |
| 6.   | High pressure stopped-flow measurements                                             | 5 |
| 6.1. | Kinetics                                                                            | 5 |
| 6.2. | High pressure stopped-flow results                                                  | 6 |
| 7.   | Atom economy calculations                                                           | 6 |
| 7.1. | Biocatalytic carboxylation of resorcinol ( <b>1</b> ) with CO <sub>2</sub> pressure | 6 |
| 8.   | References                                                                          | 7 |

---

\* Corresponding authors: <Si.Glueck@Uni-Graz.at>, <Kurt.Faber@Uni-Graz.at>

## 1. Purification of 2,6-dihydroxybenzoic acid decarboxylase from *Rhizobium* sp. (2,6-DHBD\_*Rs*) and 2,3-dihydroxybenzoic acid decarboxylase from *Aspergillus oryzae* (2,3-DHBD\_*Ao*)

Lyophilized *E. coli* cells containing the corresponding overexpressed enzyme (1 g) were rehydrated in lysis buffer (10 mM imidazole, 10 mL) for 30 min at 30 °C with 120 rpm. After ultrasonication (30% amplitude, 1 sec pulse, 4 sec pause, 5 min overall time) on ice, the cells were centrifuged (10 min at 4 °C with 18 000 rpm) and the supernatant was filtered (0.45 µm filter). For purification a HisTrapFF column with Ni-NTA matrix was used. After combining the fractions with the highest enzyme concentration (determined via Bradford assay) the fractions were centrifuged in a Vivaspin 20 (30 kDa) for 30 min at 4 °C with 4000 rpm. The purified enzymes were used for the biocarboxylation after a buffer salt exchange with a PD10 desalting column in the TRIS-HCl buffer 50 mM, pH 7.5. The overexpression of the gene was analyzed via SDS-PAGE (Figure S1).

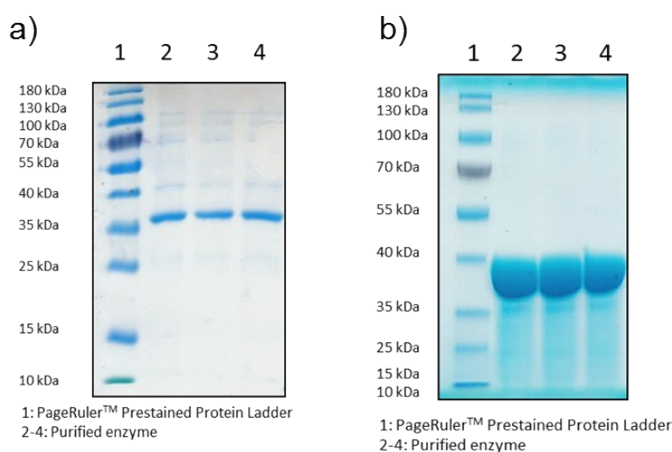

**Figure S1.** SDS-PAGE analysis of a) purified 2,6-DHBD\_*Rs* and b) purified 2,3-DHBD\_*Ao*.

## 2. Sparkling water study

### 2.1. Sparkling water analysis

Vöslauer<sup>®1</sup> (extract from full analysis) [mg L<sup>-1</sup>]: K<sup>+</sup> 1.6, Na<sup>+</sup> 14.1, Mg<sup>2+</sup> 40.7, Ca<sup>2+</sup> 112.0, Cl<sup>-</sup> 19.4, SO<sub>4</sub><sup>2-</sup> 221.0, HCO<sub>3</sub><sup>-</sup> 259.0, NO<sub>3</sub><sup>-</sup> <1.0, *m*-silicic acid 14.1, F<sup>-</sup> 0.7, dissolved solids 682.6.

Sicheldorfer<sup>®2</sup> (extract from full analysis) [mg L<sup>-1</sup>]: K<sup>+</sup> 108.8, Na<sup>+</sup> 1175.0, Mg<sup>2+</sup> 87.3, Ca<sup>2+</sup> 175.1, HCO<sub>3</sub><sup>-</sup> 3400.0, I<sup>-</sup> 0.8.

### 2.2. Sparkling water screening

For biotransformations with sparkling water as reaction medium lyophilized whole cells (30 mg, *E. coli* host cells containing overexpressed 2,3-DHBD\_*Ao*) were rehydrated in sparkling water (900 µL of Sicheldorfer<sup>®</sup>, Vöslauer<sup>®</sup>). The substrate **1** [10 mM final concentration, dissolved in 50 µL

MeOH (5% v/v)] was added to the enzyme solution (1 mL final volume) which was transferred into a glass vial. The vials were tightly sealed with screw caps and were shaken for 24 h at 120 rpm and 30 °C.

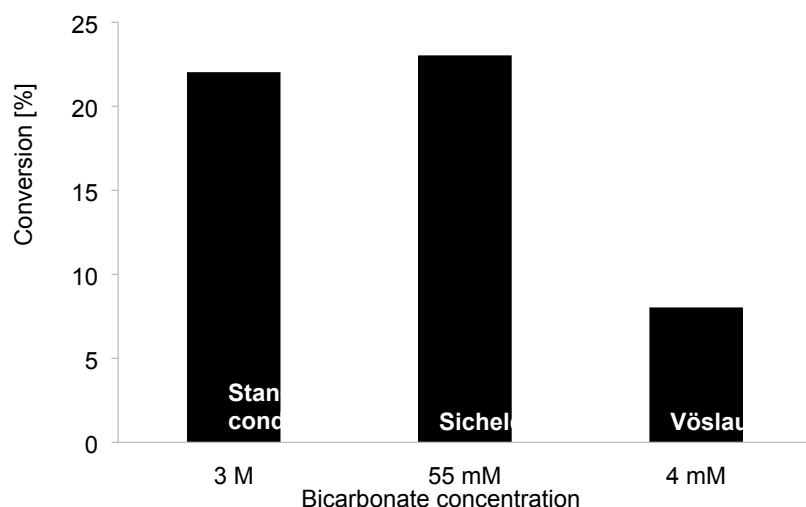

**Figure S2.** Conversion of the carboxylation of resorcinol (**1**) using 2,3-DHBD\_4o under standard conditions (3 M KHCO<sub>3</sub>) and in sparkling water.

### 3. Time study

Lyophilized whole cells (90 mg) were rehydrated in TRIS-HCl buffer (2850 µL, pH 9.0, 100 mM) and substrate **1** (10 mM final concentration) was added to the enzyme solution (3 mL final volume). The pressure reactor was tightly sealed and the reaction mixture was stirred at 50 rpm and 30 °C for 0, 1, 4, 24, 30 and 48 h.

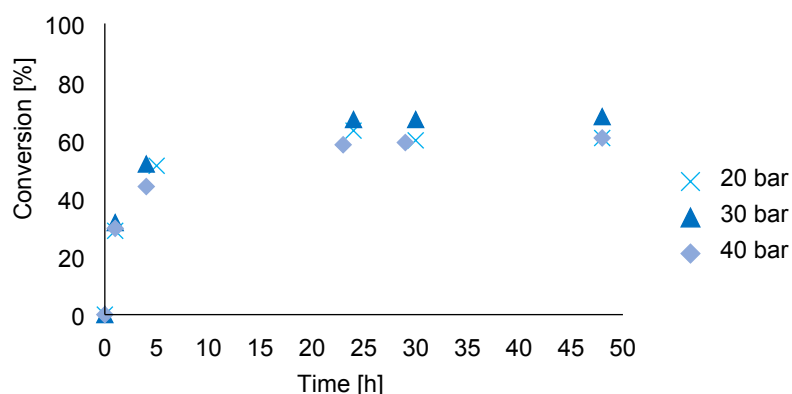

**Figure S3.** Evaluation of the reaction time for the carboxylation of resorcinol (**1**) with 2,3-DHBD\_4o under 20, 30 and 40 bar CO<sub>2</sub> pressure within 0 – 48 h.

#### 4. Evaluation of buffer system

In order to achieve higher conversions, the buffer system was changed from a P<sub>i</sub> buffer 100 mM, pH 5.5 to a TRIS-HCl buffer 100 mM, pH 9.0 (20 bar CO<sub>2</sub>, 30 °C, 50 rpm, 24 h).

**Table S1.** pH study using TRIS-HCl buffer (100 mM, pH 9.0) and phosphate buffer (100 mM, pH 5.5) under 20 bar CO<sub>2</sub> with the model substrate resorcinol (**1**) and 2,3-DHBD\_Ao.

| buffer system                    | conversion [%] |
|----------------------------------|----------------|
| Phosphate buffer, pH 5.5, 100 mM | 19             |
| TRIS-HCl buffer, pH 9.0, 100 mM  | 58             |

#### 5. High-resolution MS

500 µL of purified enzyme (2,6-DHBD\_Rs) was treated under CO<sub>2</sub> pressure (50 bar) for 24 h at 30 °C and 50 rpm in the pressure reactor in the absence of substrate. The final protein concentration was defined via Bradford assay and the sample was diluted with TRIS-HCl buffer (50 mM, pH 7.5) to a final concentration of 1 mg mL<sup>-1</sup>. As reference the native purified enzyme was used.

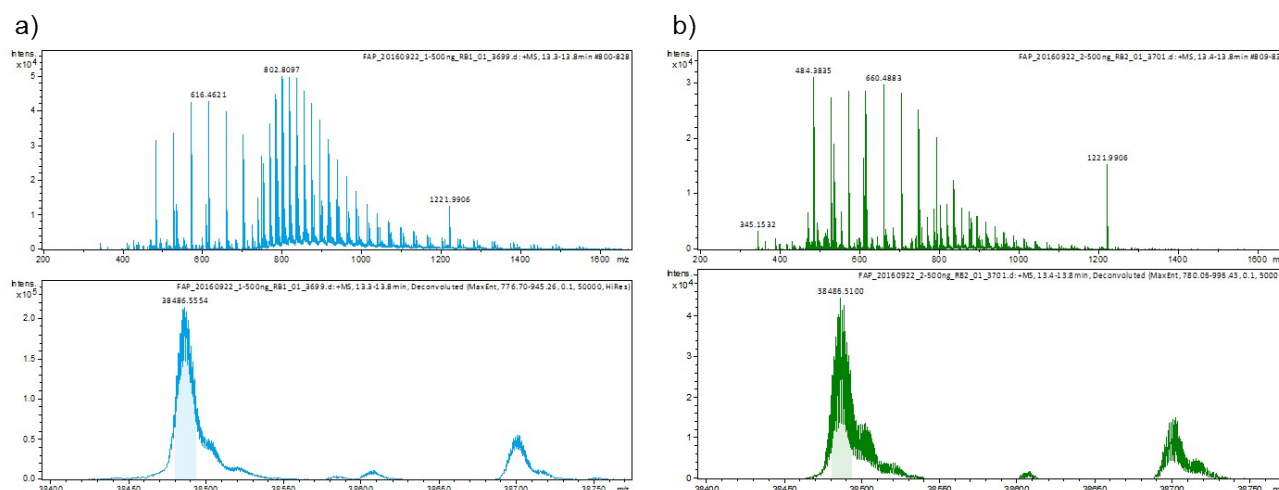

**Figure S4.** HR-MS chromatogram of a) native 2,6-DHBD\_Rs (calc.: 37398,92, found: 38486,5554) and b) 50 bar CO<sub>2</sub> pressure-treated 2,6-DHBD\_Rs (calc.: 37398,92, found: 38486,51).

## 6. High pressure stopped-flow system

### 6.1. Kinetics

Calculations of kinetic parameters for the high pressure stopped-flow measurements were done with 0.5  $\mu\text{M}$  enzyme and 0 – 750  $\mu\text{M}$  2,6-dihydroxybenzoic acid (**2a**) as substrate (Figure S5 and Figure S6).

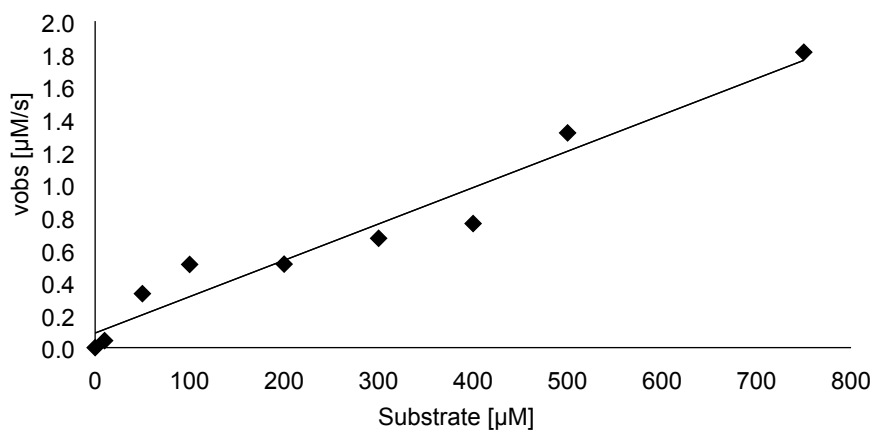

**Figure S5.** Plot of velocity vs. substrate concentration; 2,6-dhba (**2a**, 0 – 750  $\mu\text{M}$ ) with 0.5  $\mu\text{M}$  2,3-DHBD\_Ao as catalyst;  $K_m = 0.4 \text{ mM}$ ,  $k_{\text{cat}} = 3.6 \text{ s}^{-1}$ .

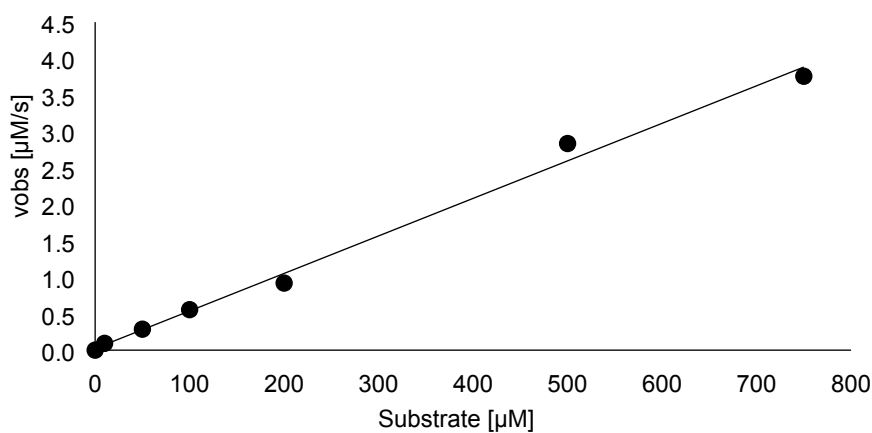

**Figure S6.** Plot of velocity vs. substrate concentration; 2,6-dhba (**2a**, 0 – 750  $\mu\text{M}$ ) with 0.5  $\mu\text{M}$  2,6-DHBD\_Rs as catalyst;  $K_m = 0.4 \text{ mM}$ ,  $k_{\text{cat}} = 7.5 \text{ s}^{-1}$ .

## 6.2. Stopped flow high-pressure results

Stopped flow high-pressure measurements with 2,3-DHBD\_Ao and 2,6-DHBD\_Rs were performed over 1 min at 30 °C at 1 bar – 1.5 kbar. Figure S7 shows the velocity ( $v_{\text{obs}}$  [ $\mu\text{M s}^{-1}$ ]) of each experiment at different pressure.

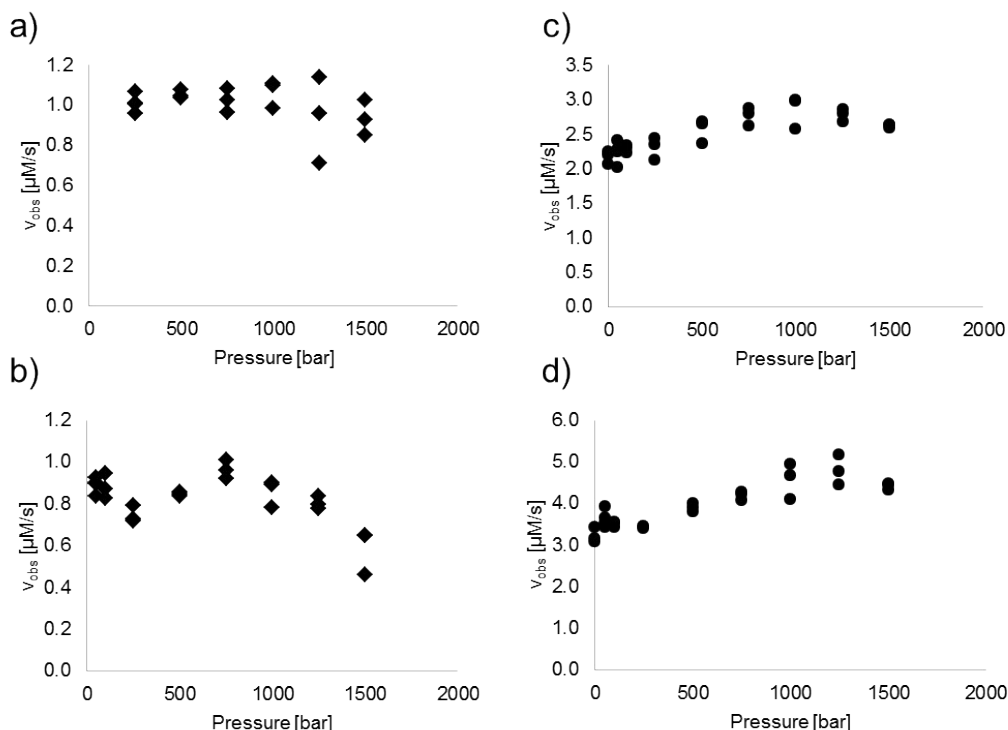

**Figure S7.** Stopped flow high-pressure measurements of 2,3-DHBD\_Ao and 2,6-DHBD\_Rs (0.5  $\mu\text{M}$ ) with 2,6-dhba (**2a**, 250 and 500  $\mu\text{M}$ , resp.) at 320 nm ( $v_{\text{obs}}$  [ $\mu\text{M s}^{-1}$ ]). a) 0.5  $\mu\text{M}$  2,3-DHBD\_Ao and 500  $\mu\text{M}$  2,6-dhba (**2a**); b) 0.5  $\mu\text{M}$  2,3-DHBD\_Ao and 250  $\mu\text{M}$  2,6-dhba (**2a**); c) 0.5  $\mu\text{M}$  2,6-DHBD\_Rs and 500  $\mu\text{M}$  2,6-dhba (**2a**); d) 0.5  $\mu\text{M}$  2,6-DHBD\_Rs and 250  $\mu\text{M}$  2,6-dhba (**2a**).

## 7. Atom economy calculations

$$\text{atom economy} = \frac{\text{molecular mass of desired product}}{\text{molecular mass of all reactants}} \times 100$$

### 7.1. Biocatalytic carboxylation of resorcinol (**1**) with $\text{CO}_2$ pressure

$$\text{atom economy} = \frac{154.12 \frac{\text{g}}{\text{mol}}}{110.11 \frac{\text{g}}{\text{mol}} + 44.01 \frac{\text{g}}{\text{mol}}} \times 100$$

**2**

$\xrightarrow{\text{CO}_2}$

**1**

The atom economy of all carboxylation methods are summarized in Table 1 (main paper).

## 8. References

<sup>1</sup> <http://www.voelslauer.com/web/at/quelle/quellanalyse> (07.10.2016)

<sup>2</sup> <http://www.heilwassersicheldorf.com/#block-block-9> (5.2.2017)
